# Supplementary material for: Mutations in Rht-B1 Locus May Negatively Affect Frost Tolerance in Bread Wheat
Source: MDPI journal article supplement (doi:10.3390/ijms23147969), 2022-07-19
Supplement: s1 [file s1]

Table S2. Quantitative summary of differentiating entities among the four tested wheat genotypes.

| Comparison<br>(based on S-plot<br>arrangement) | Positive mode experiments                 |                                                                                                                                           |                                                                                          | Negative mode experiments                 |                                                                                                                                                 |                                                 |
|------------------------------------------------|-------------------------------------------|-------------------------------------------------------------------------------------------------------------------------------------------|------------------------------------------------------------------------------------------|-------------------------------------------|-------------------------------------------------------------------------------------------------------------------------------------------------|-------------------------------------------------|
|                                                | Sum of all<br>differentiating<br>entities | Sum of<br>differentiating<br>entities over the<br>intensity level<br>required for<br>adequate signal-<br>to-noise level<br>MS/MS analysis | Entities assigned<br>to the eight<br>polyamine<br>derivatives or<br>the 17<br>flavonoids | Sum of all<br>differentiating<br>entities | Sum of<br>differentiating<br>entities over<br>the intensity<br>level required<br>for adequate<br>signal-to-<br>noise level<br>MS/MS<br>analysis | Entities<br>assigned to<br>the 17<br>flavonoids |
| <i>Rht-B1a</i> vs. <i>Rht-B1b</i><br>Day 0     | 54                                        | 9                                                                                                                                         | 2                                                                                        | 67                                        | 14                                                                                                                                              | 9                                               |
| <i>Rht-B1a</i> vs. <i>Rht-B1b</i><br>Day 2     | 325                                       | 14                                                                                                                                        | 0                                                                                        | 57                                        | 11                                                                                                                                              | 8                                               |
| <i>Rht-B1a</i> vs. <i>Rht-B1b</i><br>Day 7     | 76                                        | 22                                                                                                                                        | 20                                                                                       | 53                                        | 10                                                                                                                                              | 9                                               |
| <i>Rht-B1a</i> vs. <i>Rht-B1b</i><br>Day 12    | 13                                        | 12                                                                                                                                        | 12                                                                                       | 32                                        | 12                                                                                                                                              | 9                                               |
| <i>Rht-B1a</i> vs. <i>Rht-B1c</i><br>Day 0     | 177                                       | 19                                                                                                                                        | 10                                                                                       | 161                                       | 11                                                                                                                                              | 10                                              |
| <i>Rht-B1a</i> vs. <i>Rht-B1c</i><br>Day 2     | 726                                       | 36                                                                                                                                        | 28                                                                                       | 478                                       | 15                                                                                                                                              | 11                                              |
| <i>Rht-B1a</i> vs. <i>Rht-B1c</i><br>Day 7     | 213                                       | 23                                                                                                                                        | 18                                                                                       | 350                                       | 11                                                                                                                                              | 9                                               |
| <i>Rht-B1a</i> vs. <i>Rht-B1c</i><br>Day 12    | 72                                        | 17                                                                                                                                        | 14                                                                                       | 188                                       | 17                                                                                                                                              | 10                                              |
| <i>Rht-B1b</i> vs. <i>Rht-B1c</i><br>Day 0     | 86                                        | 14                                                                                                                                        | 10                                                                                       | 107                                       | 13                                                                                                                                              | 11                                              |
| <i>Rht-B1b</i> vs. <i>Rht-B1c</i><br>Day 2     | 241                                       | 17                                                                                                                                        | 15                                                                                       | 183                                       | 12                                                                                                                                              | 10                                              |
| <i>Rht-B1b</i> vs. <i>Rht-B1c</i><br>Day 7     | 51                                        | 11                                                                                                                                        | 7                                                                                        | 128                                       | 15                                                                                                                                              | 10                                              |
| <i>Rht-B1b</i> vs. <i>Rht-B1c</i><br>Day 12    | 39                                        | 13                                                                                                                                        | 11                                                                                       | 135                                       | 21                                                                                                                                              | 9                                               |
| <i>Rht-B1a</i> vs. Béres Day<br>0              | 288                                       | 25                                                                                                                                        | 8                                                                                        | 520                                       | 18                                                                                                                                              | 10                                              |
| <i>Rht-B1a</i> vs. Béres Day<br>2              | 519                                       | 21                                                                                                                                        | 6                                                                                        | 451                                       | 19                                                                                                                                              | 7                                               |
| <i>Rht-B1a</i> vs. Béres Day<br>7              | 316                                       | 20                                                                                                                                        | 8                                                                                        | 445                                       | 13                                                                                                                                              | 5                                               |
| <i>Rht-B1a</i> vs. Béres Day<br>12             | 593                                       | 47                                                                                                                                        | 24                                                                                       | 552                                       | 21                                                                                                                                              | 9                                               |
| <i>Rht-B1b</i> vs. Béres Day<br>0              | 246                                       | 26                                                                                                                                        | 5                                                                                        | 387                                       | 13                                                                                                                                              | 6                                               |
| <i>Rht-B1b</i> vs. Béres Day<br>2              | 330                                       | 30                                                                                                                                        | 5                                                                                        | 349                                       | 21                                                                                                                                              | 7                                               |
| <i>Rht-B1b</i> vs. Béres Day<br>7              | 404                                       | 32                                                                                                                                        | 20                                                                                       | 619                                       | 15                                                                                                                                              | 7                                               |
| <i>Rht-B1b</i> vs. Béres Day<br>12             | 508                                       | 44                                                                                                                                        | 24                                                                                       | 596                                       | 17                                                                                                                                              | 7                                               |
| <i>Rht-B1c</i> vs. Béres Day<br>0              | 274                                       | 44                                                                                                                                        | 14                                                                                       | 467                                       | 10                                                                                                                                              | 6                                               |
| <i>Rht-B1c</i> vs. Béres Day<br>2              | 589                                       | 53                                                                                                                                        | 24                                                                                       | 554                                       | 14                                                                                                                                              | 7                                               |
| <i>Rht-B1c</i> vs. Béres Day<br>7              | 643                                       | 40                                                                                                                                        | 24                                                                                       | 725                                       | 20                                                                                                                                              | 10                                              |
| <i>Rht-B1c</i> vs. Béres Day<br>12             | 589                                       | 49                                                                                                                                        | 20                                                                                       | 444                                       | 15                                                                                                                                              | 7                                               |

**Table S3.** Statistically differentiating oligohexoses (fructans) detected in the four wheat genotypes with hydrophilic interaction chromatography (HILIC). (\*) refers to  $[M+Na]^+$ , (#) refers to  $[M+2Na]^{2+}$ .

| Retention time, min | Tentative identification | Elemental composition (neutral) | Theoretical m/z         | Experimental m/z | Difference, ppm |
|---------------------|--------------------------|---------------------------------|-------------------------|------------------|-----------------|
| 11.50               | Oligo-5                  | C30H52O26                       | 851.26390*              | 851.26530        | 1.64            |
| 12.16               | Oligo-6                  | C36H62O31                       | 1013.31673*             | 1013.31830       | 1.55            |
| 12.70               | Oligo-7                  | C42H72O36                       | 1175.36955*             | 1175.37179       | 1.91            |
| 13.18               | Oligo-8                  | C48H82O41                       | 1337.42237*             | 1337.42487       | 1.87            |
| 13.59               | Oligo-9                  | C54H92O46                       | 1499.47520*             | 1499.47753       | 1.55            |
| 13.98               | Oligo-10                 | C60H102O51                      | 1661.52802*             | 1661.53092       | 1.75            |
| 14.26               | Oligo-11                 | C66H112O56                      | 1823.58084*             | 1823.58437       | 1.94            |
| 14.61               | Oligo-12                 | C72H122O61                      | 1985.63367*             | 1985.63767       | 2.01            |
| 14.86               | Oligo-13                 | C78H132O66                      | 1085.33786 <sup>#</sup> | 1085.33942       | 1.44            |
| 15.13               | Oligo-14                 | C84H142O71                      | 1166.36427 <sup>#</sup> | 1166.36531       | 0.89            |
| 15.37               | Oligo-15                 | C90H152O76                      | 1247.39068 <sup>#</sup> | 1247.39281       | 1.71            |
| 15.64               | Oligo-16                 | C96H162O81                      | 1328.41709 <sup>#</sup> | 1328.41879       | 1.28            |
| 15.82               | Oligo-17                 | C102H172O86                     | 1409.44350 <sup>#</sup> | 1409.44581       | 1.64            |
| 16.00               | Oligo-18                 | C108H182O91                     | 1490.46991 <sup>#</sup> | 1490.47049       | 0.39            |

**Table S4.** UPLC/HPLC-PDA-Unispray-QTOF-MS instrumental setup parameters

| <b>Acquity I-Class UPLC</b> |                                                                                                                                                                                                                                                                         | <b>Vion PDA IMS Unispray (+/-) -QTOF-MS</b>               |                                                              |
|-----------------------------|-------------------------------------------------------------------------------------------------------------------------------------------------------------------------------------------------------------------------------------------------------------------------|-----------------------------------------------------------|--------------------------------------------------------------|
| <b>UPLC column</b>          | <b>Acquity BEH C18, 2.1*100 mm; 1.7 <math>\mu</math>m</b>                                                                                                                                                                                                               | Source temperature                                        | 120°C                                                        |
| Eluent “A”                  | water with 0.1 v/v% formic acid                                                                                                                                                                                                                                         | Desolvation temperature                                   | 550°C                                                        |
| Eluent “B”                  | acetonitrile with 0.1 v/v% formic acid                                                                                                                                                                                                                                  | Desolvation gas                                           | 1000 L/h                                                     |
| Flow rate                   | 0.5 ml/min                                                                                                                                                                                                                                                              | Cone gas                                                  | 100 L/h                                                      |
| Column temperature          | 30°C                                                                                                                                                                                                                                                                    | IMS<br>MS scan<br>MS scan time<br>Lock mass<br>MS/MS scan | OFF<br>100 – 2000 m/z<br>0.4 s<br>ON<br>50 – 2000 m/z        |
| Gradient                    | 0 – 0.5 min 4% “B”<br>0.5 – 10.0 min $\uparrow$ 20% “B”<br>10.0 – 15.0 min $\uparrow$ 40% “B”<br>15.0 – 20.0 min $\uparrow$ 80% “B”<br>20.0 – 20.5 min $\uparrow$ 100% “B”<br>20.5 – 23.0 min 100% “B”<br>23.0 – 23.5 min $\downarrow$ 4% “B”<br>23.5 – 26.0 min 4% “B” | MS <sup>E</sup> Low collision energy                      | 6.0 eV                                                       |
| Injection volume            | 3.0 $\mu$ l                                                                                                                                                                                                                                                             | MS <sup>E</sup> High collision energy ramp                | 20 – 30 eV                                                   |
| Sample temperature          | 8°C                                                                                                                                                                                                                                                                     | Capillary voltage                                         | 0.30 kV                                                      |
| <b>HPLC column</b>          | <b>SeQuant ZIC-cHILIC, 2.1*100 mm; 3.0 <math>\mu</math>m</b>                                                                                                                                                                                                            | Cone voltage                                              | 40 V                                                         |
| Eluent “A”                  | water + 5 mM ammonium acetate                                                                                                                                                                                                                                           | MS/MS collision energy                                    | Individually set between 11.1-37.7 V and (-12.6) – (-37.7) V |
| Eluent “B”                  | (9:1 acetonitrile:water) + 5 mM ammonium acetate                                                                                                                                                                                                                        | <b>PDA detector</b>                                       |                                                              |
| Flow rate                   | 0.35 ml/min                                                                                                                                                                                                                                                             | Sampling rate                                             | 20 points/sec                                                |
| Column temperature          | 30°C                                                                                                                                                                                                                                                                    | Wavelength                                                | 220-600 nm                                                   |
| Gradient                    | 0 – 0.5 min 100% “B”<br>0.5 – 20.0 min $\downarrow$ 40% “B”<br>20.0 – 22.0 min 40% “B”<br>22.0 – 23.0 min $\uparrow$ 100% “B”<br>23.0 – 20.5 min $\uparrow$ 100% “B”<br>20.5 – 30.0 min 100% “B”                                                                        | Resolution                                                | 2.4 nm                                                       |
| Injection volume            | 2.0 $\mu$ l                                                                                                                                                                                                                                                             |                                                           |                                                              |
| Sample temperature          | 8°C                                                                                                                                                                                                                                                                     |                                                           |                                                              |
